# Supplementary figures and images for: Textbook Neoadjuvant Outcome—Novel Composite Measure of Oncological Outcomes among Gastric Cancer Patients Undergoing Multimodal Treatment
Source: MDPI journal article supplement (doi:10.3390/cancers16091721), 2024-04-28

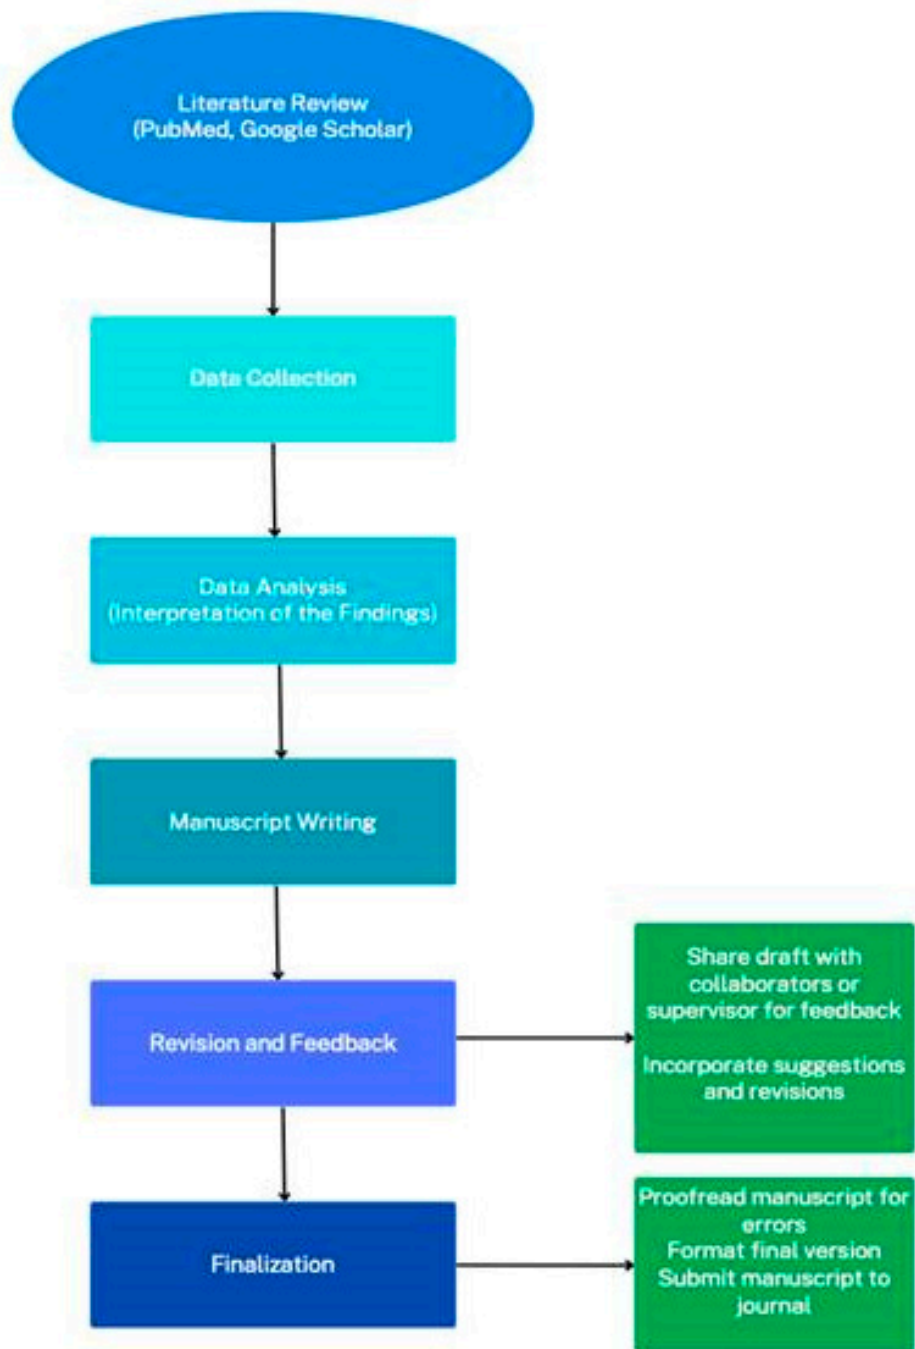

**Figure S1.** Flowchart of study path.

Supplement: s1 [file cancers-2976779-supplementary.pdf › cancers-2976779-supplementary.pdf]
